# Supplementary material
Source: PubMed Central journal article supplement (PMC7172281)
Supplement: NIHMS1579431-supplement-1.pdf [file NIHMS1579431-supplement-1.pdf]

Cell Reports, Volume 30

## Supplemental Information

**Acute *Plasmodium* Infection Promotes**

**Interferon-Gamma-Dependent**

**Resistance to Ebola Virus Infection**

**Kai J. Rogers, Olena Shtanko, Rahul Vijay, Laura N. Mallinger, Chester J. Joyner, Mary R. Galinski, Noah S. Butler, and Wendy Maury**

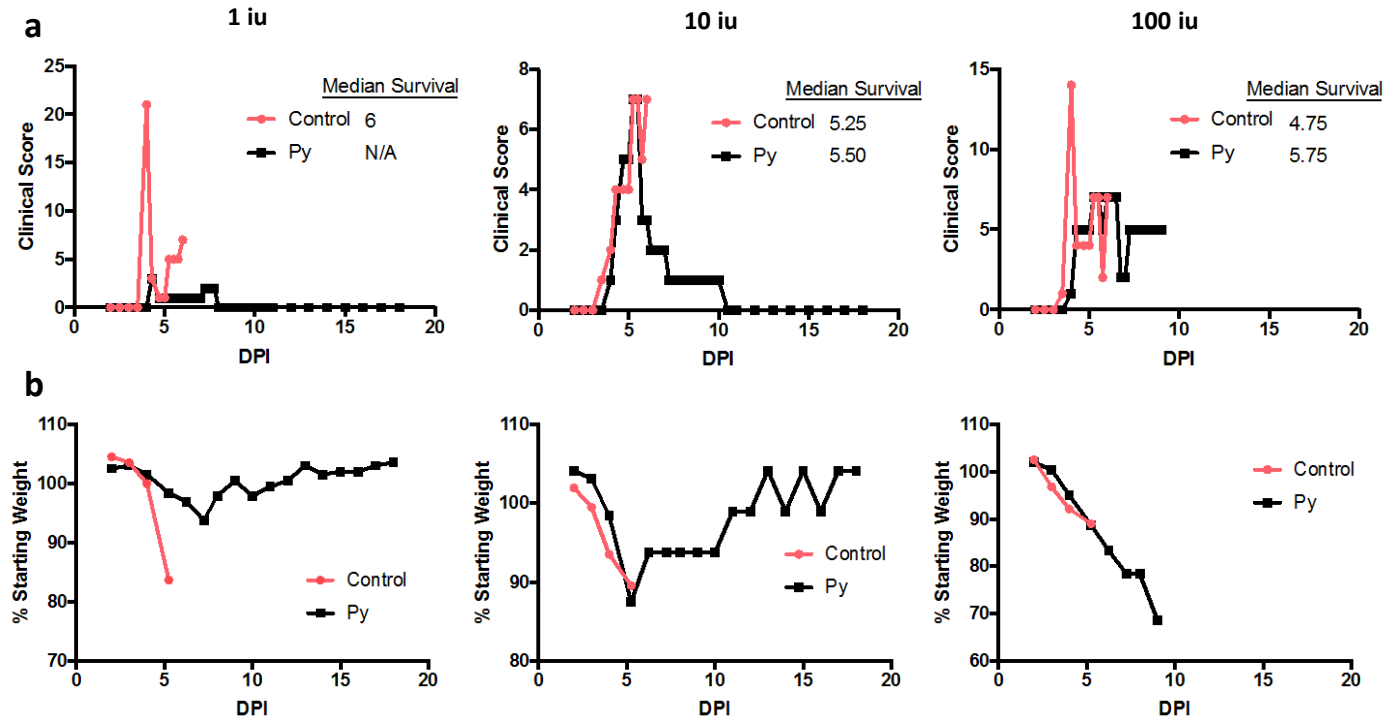

**Figure S1: Acute *Plasmodium* infection in mice protects against EBOV challenge, Related to Figure 1.** WT BALB/c mice were infected with  $1 \times 10^6$  *Plasmodium yoelli* iRBCs and challenged with 1, 10 or 100 iu ma-EBOV (Mayinga) 6 days later. Mice were monitored up to 4 times daily during the critical phase and morbidity was assessed. Shown are clinical scores (**a**) and weight loss (**b**). Data are expressed as either aggregate clinical scores or average weights compiled from all surviving mice at the time of observation (n=1-7). Statistical analyses were not performed as each point represents an average value of a variable number of mice depending on the number of surviving animals.

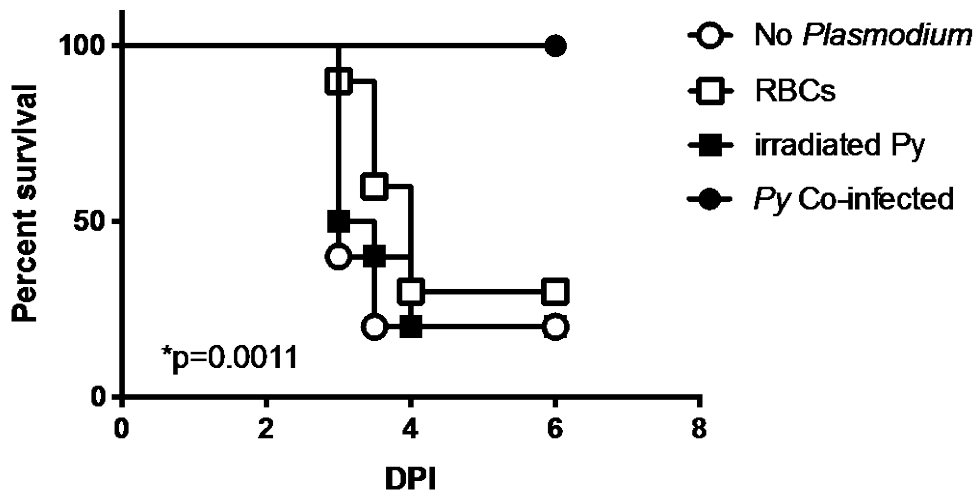

**Figure S2: RBCs and irradiated *Py* iRBCs do not protect from rVSV/EBOV GP challenge, Related to Figure 2.** C57BL/6 *Ifnar*<sup>-/-</sup> mice were inoculated i.v. with 10<sup>6</sup> of the indicated RBCs (*Py* infected, uninfected, or irradiated). Mice were challenged with a lethal dose of rVSV/EBOV GP 6 days later. Survival was monitored. n=10 per group.

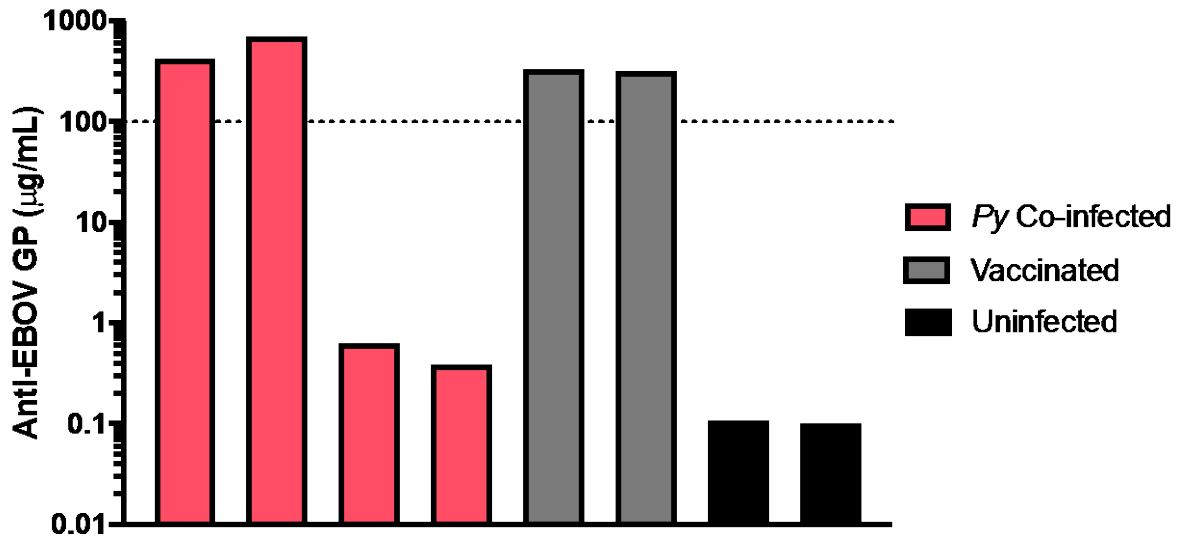

**Figure S3: EBOV GP antibody production in *Py* infected mice, Related to Figure 2.** *C57BL/6 Ifnar<sup>-/-</sup>* mice were infected i.v. with  $1 \times 10^6$  *Plasmodium yoelli* iRBCs. These mice were challenged with a dose of rVSV/EBOV GP that is lethal to naïve mice (red) or  $1 \times 10^3$  EBOV pseudovirions (gray) 6 days later. Anti-GP antibodies in the serum at day 21 were measured by ELISA. Line represents the amount of antibody previously found to be predictive of protection against ma-EBOV challenge. Each bar represents an average of 2 replicates from a single mouse.

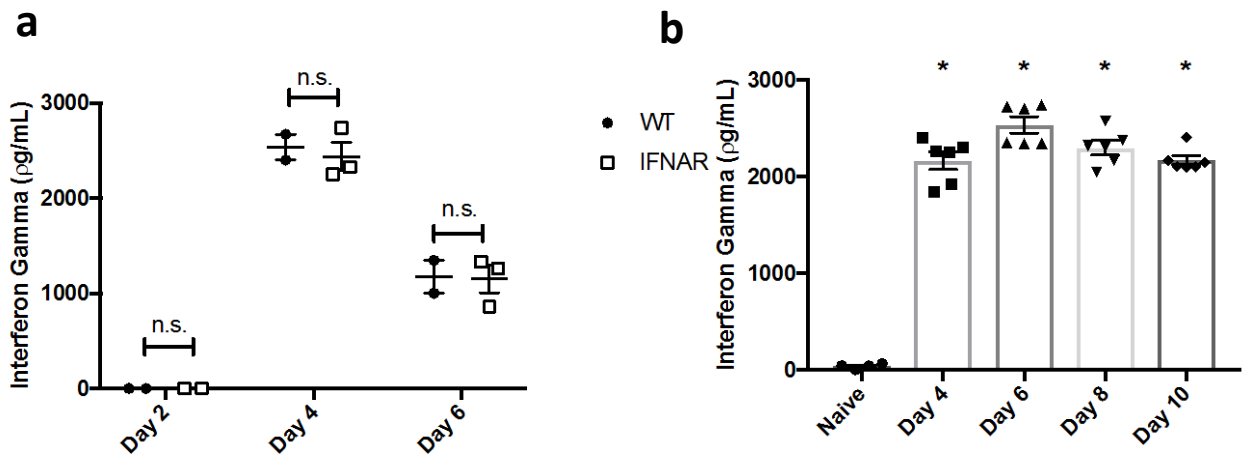

**Figure S4: *Plasmodium yoelii* infection robustly stimulates serum IFN- $\gamma$  levels in WT, *Ifnar*<sup>-/-</sup> and *Ifnar/Ifngr*<sup>-/-</sup> mouse strains, Related to Figure 3. a) WT BALB/c (closed squares) or BALB/c *Ifnar*<sup>-/-</sup> (open squares) mice were infected with  $1 \times 10^6$  *Plasmodium yoelii* iRBCs and IFN- $\gamma$  production was measured by ELISA at the indicated times after infection. b) C57BL/6 *Ifnar/Ifngr*<sup>-/-</sup> mice were infected with  $1 \times 10^6$  *Plasmodium yoelii* iRBCs. At the indicated times after infection, serum was harvested and IFN- $\gamma$  was measured by ELISA. For all experiments, \* indicates  $p < 0.05$ .**

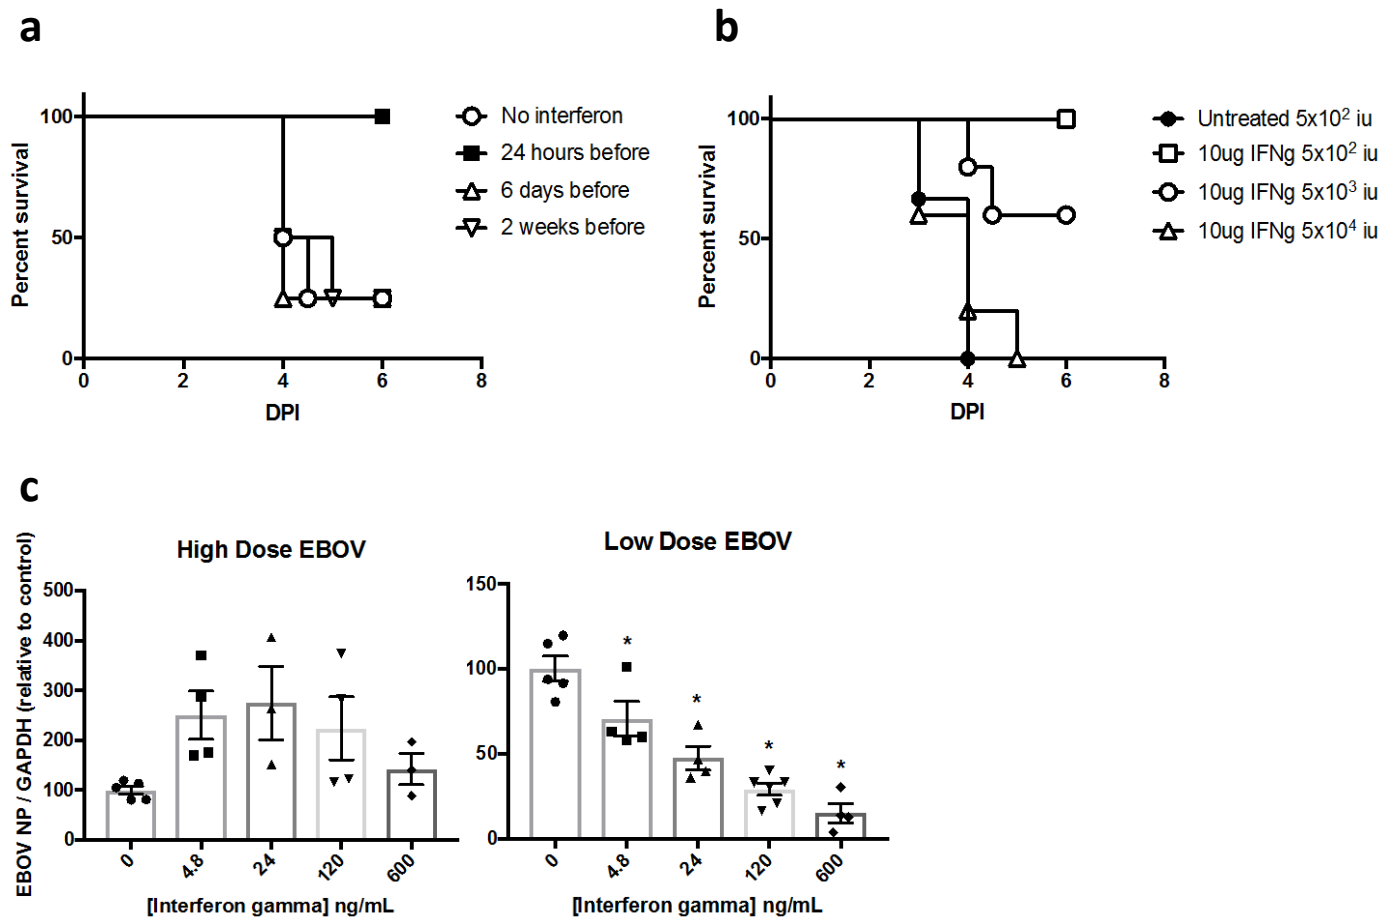

**Figure S5: Amount and timing of rVSV/EBOV GP delivered is critical for IFN- $\gamma$  mediated protection from infection, Related to Figure 5.** **a)** *Ifnar*<sup>-/-</sup> mice were injected with 5 $\mu$ g IFN- $\gamma$  at the indicated times prior to challenge with rVSV/EBOV GP. Mice were observed daily (n=4/group). **b)** *Ifnar*<sup>-/-</sup> mice were injected with 5 $\mu$ g IFN- $\gamma$  24 hours prior to challenge with the indicated amount of rVSV/EBOV GP (n=3 untreated, n=5 for each treated group). Mice were observed daily. **c)** *Ifnar*<sup>-/-</sup> pmacs were treated with varying concentrations of IFN- $\gamma$  and infected with ma-EBOV under BSL-4 conditions 24 hours later. Cells were infected with either a high dose (2000 pfu) or low dose (200 pfu) of EBOV. RNA was isolated 24 hpi and virus replication was quantified by qRT-PCR for EBOV NP gene expression.
