# Supplementary material
Source: PubMed Central journal article supplement (PMC7172281)
Supplement: NIHMS1579431-supplement-2.pdf [file NIHMS1579431-supplement-2.pdf]

Table S1: Primers used for qRT-PCR

| Primer               | Sequence                        |
|----------------------|---------------------------------|
| HPRT forward         | 5'-GCGTCGTGATTAGCGATGATG-3'     |
| HPRT reverse         | 5'-CTCGAGCAAGTCTTTTCAGTCC-3'    |
| VSV-M forward        | 5'-CCTGGATTCTATCAGCCACTTC-3'    |
| VSV-M reverse        | 5'-TTGTTCGAGAGGCTGGAATTAG-3'    |
| GAPDH forward        | 5'-GGTGTGAACCATGAGAAGTATGA-3'   |
| GAPDH reverse        | 5'-GAGTCCTTCCACGATACCAAAG-3'    |
| EBOV NP forward      | 5'-CAGTGCGCCACTCACGGACA-3'      |
| EBOV NP reverse      | 5'-TGGTGTCAGCATGCGAGGGC-3'      |
| murine IRF-1 forward | 5'-TCACACAGGCCGATACAAAG-3'      |
| murine IRF-1 reverse | 5'-GATCCTTCACTTCCTCGATGTC-3'    |
| murine GBP5 forward  | 5'-CCCAGGAAGAGGCTGATAG-3'       |
| murine GBP5 reverse  | 5'-TCTACGGTGGTGGTTCATTT-3'      |
| human IRF-1 forward  | 5'-CGCATGAGACCCTGGCTAGA-3'      |
| human IRF-1 reverse  | 5'-TGTATCGGCCTGTGTGAATGG-3'     |
| human GBP5 forward   | 5'-ATTATTCTGGCCTCCGCTGC-3'      |
| human GBP5 reverse   | 5'-TGTCTAGGATGTTACTTTGCCTTAT-3' |
